# Supplementary material
Source: publisher figshare collection journal article supplement (https://frontiersin.figshare.com/ndownloader/files/27728643)
Supplement: Supplementary file [file 27728643]

**Supplementary table 1. Assessment of risk of bias within studies included in EPAG+IST and haplo-HSCT group**

| <b>Author<br/>(Year)</b> | <b>Were<br/>adequate<br/>eligibility<br/>criteria<br/>developed<br/>and applied</b> | <b>Was the<br/>measurement<br/>of both<br/>exposure and<br/>outcome<br/>adequate?</b> | <b>Was<br/>confounding<br/>adequately<br/>controlled<br/>for?</b> | <b>Was the<br/>follow-up<br/>complete and<br/>adequate in<br/>duration?</b> | <b>Are reports of the<br/>study free of<br/>suggestion of<br/>selective outcome<br/>reporting?</b> | <b>Was the study<br/>free of other<br/>problems that<br/>put it at a<br/>high risk of<br/>bias?</b> | <b>Risk of<br/>bias</b> |
|--------------------------|-------------------------------------------------------------------------------------|---------------------------------------------------------------------------------------|-------------------------------------------------------------------|-----------------------------------------------------------------------------|----------------------------------------------------------------------------------------------------|-----------------------------------------------------------------------------------------------------|-------------------------|
| Townsley (2017)          | YES                                                                                 | YES                                                                                   | YES                                                               | YES                                                                         | YES                                                                                                | YES                                                                                                 | Low                     |
| Assi (2018)              | YES                                                                                 | YES                                                                                   | YES                                                               | YES                                                                         | YES                                                                                                | YES                                                                                                 | Low                     |
| Groarke (2019)           | YES                                                                                 | YES                                                                                   | Unclear                                                           | YES                                                                         | YES                                                                                                | YES                                                                                                 | Unclear                 |
| Imada (2020)             | YES                                                                                 | YES                                                                                   | YES                                                               | YES                                                                         | YES                                                                                                | Unclear                                                                                             | Unclear                 |
| Yang (2019)              | YES                                                                                 | YES                                                                                   | Unclear                                                           | YES                                                                         | YES                                                                                                | YES                                                                                                 | Unclear                 |
| Xu (2019)                | YES                                                                                 | YES                                                                                   | Unclear                                                           | YES                                                                         | YES                                                                                                | YES                                                                                                 | Unclear                 |
| Cheng (2018)             | YES                                                                                 | YES                                                                                   | Unclear                                                           | YES                                                                         | YES                                                                                                | YES                                                                                                 | Unclear                 |
| Xu (2017)                | YES                                                                                 | YES                                                                                   | Unclear                                                           | YES                                                                         | YES                                                                                                | YES                                                                                                 | Unclear                 |
| Choi (2017)              | YES                                                                                 | YES                                                                                   | Unclear                                                           | YES                                                                         | YES                                                                                                | YES                                                                                                 | Unclear                 |
| Zhang (2017)             | YES                                                                                 | YES                                                                                   | Unclear                                                           | YES                                                                         | YES                                                                                                | NO                                                                                                  | High                    |
